# Supplementary material for: Signatures of Urbanization in Temperate Highland Peat Swamps on Sandstone (THPSS) of the Blue Mountains World Heritage Area
Source: MDPI journal article supplement (doi:10.3390/w14223724), 2022-11-17
Supplement: s1 [file s1]

Archive with 1 entries (1 files):
- water-1987078-supplementary.pdf
