# Supplementary material for: Signatures of Urbanization in Temperate Highland Peat Swamps on Sandstone (THPSS) of the Blue Mountains World Heritage Area
Source: MDPI journal article supplement (doi:10.3390/w14223724), 2022-11-17
Supplement: s1 [file s1 › water-1987078-supplementary.pdf]

**Supplementary Data for**

# **Signatures of Urbanization in Temperate Highland Peat Swamps on Sandstone (THPSS) of the Blue Mountains World Heritage Area**

**Rani Carroll, Jason K. Reynolds and Ian A. Wright \***

School of Science, Western Sydney University, Locked Bag 1797,  
Penrith, NSW 2751, Australia

\* Correspondence: [i.wright@westernsydney.edu.au](mailto:i.wright@westernsydney.edu.au)

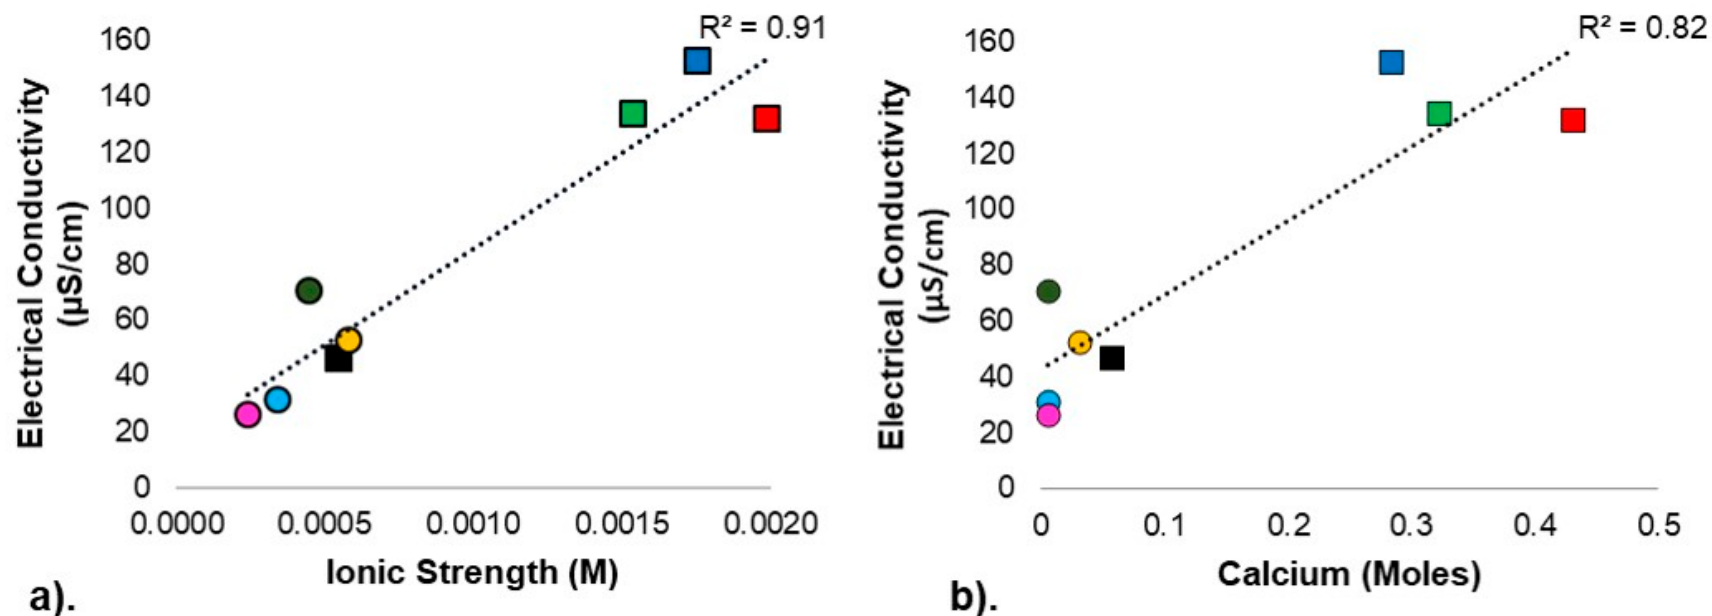

**Supplementary Data Figure S1.** Electrical conductivity compared to a). ionic strength (Moles; M) and b). calcium (M). Urban catchments are indicated by squares and naturally vegetated catchments by circles. Sites are indicated as Bullaburra (red), Wentworth Falls (black), North Lawson (dark blue), Popes Glen (light green), Mount Hay (light blue), Hat Hill (pink), Lawson (dark green) and Kings Tableland (orange). The  $R^2$  values and trendlines are also included.

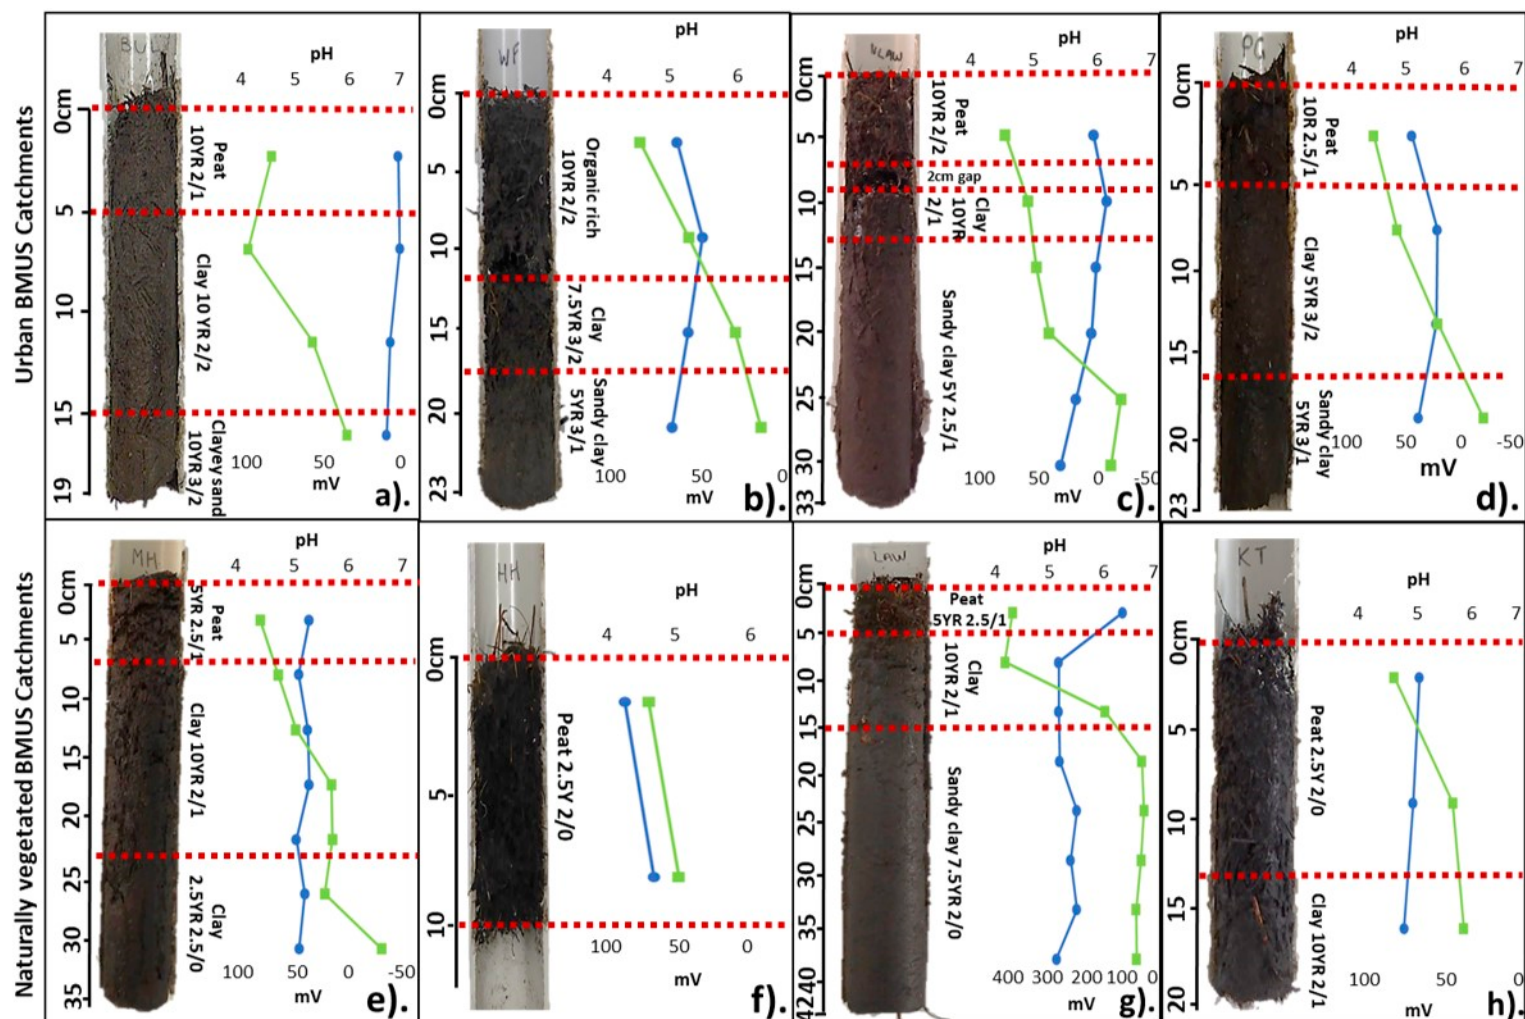

**Supplementary Data Figure S2.** Summary of Redox (mV; indicated in green) and pH (pH units; indicated in blue) data for sediment cores from urban Temperate Highland Peat Swamps on Sandstone (THPSS) a). Bullaburra, b). Wentworth Falls, c). North Lawson, d). Popes Glen, and naturally vegetated THPSS catchments e). Mount Hay, f). Hat Hill, g). Lawson and h). Kings Tableland. Horizons are indicated by red dotted lines and descriptive data on colors per layer are identified.

**Supplementary Data Table S1.** Eigenvalues for the Principal Component Analysis (PCA) conducted in R for the eight Temperate Highland Peat Swamps on Sandstone (THPSS) assessed in the Blue Mountains (with four urban and four naturally vegetated sites) over three sampling events (from April – June 2018).

| Eigenvalues          | Dim.1  | Dim.2  | Dim.3  | Dim.4  | Dim.5  | Dim.6  | Dim.7   | Dim.8  | Dim.9  | Dim.10 | Dim.11 | Dim.12 | Dim.13 | Dim.14 |
|----------------------|--------|--------|--------|--------|--------|--------|---------|--------|--------|--------|--------|--------|--------|--------|
| Variance             | 14.050 | 7.287  | 3.422  | 2.557  | 1.915  | 1.386  | 1.097   | 0.828  | 0.409  | 0.347  | 0.275  | 0.149  | 0.095  | 0.084  |
| % of var.            | 41.322 | 21.432 | 10.065 | 7.522  | 5.631  | 4.077  | 3.226   | 2.434  | 1.204  | 1.021  | 0.810  | 0.439  | 0.280  | 0.248  |
| Cumulative % of var. | 41.322 | 62.754 | 72.819 | 80.341 | 85.972 | 90.049 | 93.275  | 95.709 | 96.913 | 97.934 | 98.744 | 99.183 | 99.464 | 99.711 |
|                      | Dim.15 | Dim.16 | Dim.17 | Dim.18 | Dim.19 | Dim.20 | Dim.21  |        |        |        |        |        |        |        |
| Variance             | 0.043  | 0.022  | 0.012  | 0.010  | 0.006  | 0.004  | 0.002   |        |        |        |        |        |        |        |
| % of var.            | 0.128  | 0.063  | 0.035  | 0.028  | 0.018  | 0.012  | 0.005   |        |        |        |        |        |        |        |
| Cumulative % of var. | 99.839 | 99.902 | 99.937 | 99.966 | 99.984 | 99.995 | 100.000 |        |        |        |        |        |        |        |

**Supplementary Data Table S2.** Summary of variables for the Principal Component Analysis (PCA) conducted in R for the eight Temperate Highland Peat Swamps on Sandstone (THPSS) assessed in the Blue Mountains (with four urban and four naturally vegetated sites) over three sampling events (from April – June 2018). Dist refers to the distance matrix, Dim refers to the dimension number (first three are shown), ctr refers to the contribution of each variable to a given principal component (as a percentage (%)), and cos2 refers to the squared cosine for each principal component that indicates the quality of representation for variables.

| Variables      | Dim.1  | ctr   | cos2  | Dim.2  | ctr   | cos2  | Dim.3  | ctr    | cos2  |
|----------------|--------|-------|-------|--------|-------|-------|--------|--------|-------|
| Site           | -0.734 | 3.832 | 0.538 | 0.319  | 1.397 | 0.102 | 0.133  | 0.515  | 0.018 |
| Site_no        | -0.734 | 3.832 | 0.538 | 0.319  | 1.397 | 0.102 | 0.133  | 0.515  | 0.018 |
| Catchment_Type | -0.743 | 3.926 | 0.552 | 0.497  | 3.387 | 0.247 | 0.166  | 0.800  | 0.027 |
| Sampling_event | 0.093  | 0.062 | 0.009 | 0.309  | 1.314 | 0.096 | -0.872 | 22.219 | 0.760 |
| IA             | 0.752  | 4.027 | 0.566 | -0.521 | 3.721 | 0.271 | -0.136 | 0.544  | 0.019 |
| pH             | 0.859  | 5.248 | 0.737 | -0.337 | 1.558 | 0.113 | -0.120 | 0.420  | 0.014 |
| EC             | 0.743  | 3.927 | 0.552 | -0.474 | 3.086 | 0.225 | -0.047 | 0.066  | 0.002 |
| DO             | -0.248 | 0.438 | 0.061 | 0.606  | 5.038 | 0.367 | -0.225 | 1.480  | 0.051 |
| Temp           | -0.030 | 0.006 | 0.001 | -0.106 | 0.153 | 0.011 | 0.869  | 22.086 | 0.756 |
| NTU            | 0.842  | 5.051 | 0.710 | 0.497  | 3.388 | 0.247 | 0.086  | 0.214  | 0.007 |
| N              | 0.253  | 0.457 | 0.064 | 0.226  | 0.703 | 0.051 | 0.668  | 13.030 | 0.446 |
| P              | -0.219 | 0.340 | 0.048 | 0.254  | 0.885 | 0.065 | -0.511 | 7.632  | 0.261 |
| Ca             | 0.848  | 5.123 | 0.720 | -0.466 | 2.981 | 0.217 | 0.024  | 0.017  | 0.001 |
| K              | 0.804  | 4.599 | 0.646 | -0.228 | 0.713 | 0.052 | -0.169 | 0.832  | 0.028 |
| Na             | 0.401  | 1.145 | 0.161 | -0.647 | 5.742 | 0.418 | 0.088  | 0.227  | 0.008 |
| Mg             | 0.804  | 4.599 | 0.646 | -0.389 | 2.080 | 0.152 | 0.052  | 0.079  | 0.003 |
| HCO3           | 0.849  | 5.131 | 0.721 | -0.397 | 2.161 | 0.157 | 0.060  | 0.107  | 0.004 |
| SO42           | 0.649  | 3.001 | 0.422 | 0.262  | 0.942 | 0.069 | -0.201 | 1.177  | 0.040 |
| Cl             | 0.363  | 0.935 | 0.131 | -0.607 | 5.062 | 0.369 | -0.131 | 0.499  | 0.017 |
| Al             | 0.562  | 2.250 | 0.316 | 0.788  | 8.518 | 0.621 | 0.072  | 0.150  | 0.005 |
| Mn             | 0.787  | 4.412 | 0.620 | 0.241  | 0.794 | 0.058 | 0.165  | 0.793  | 0.027 |
| Fe             | 0.794  | 4.487 | 0.630 | 0.205  | 0.579 | 0.042 | 0.079  | 0.184  | 0.006 |
| Ni             | 0.715  | 3.638 | 0.511 | 0.673  | 6.213 | 0.453 | -0.023 | 0.016  | 0.001 |
| Zn             | 0.094  | 0.064 | 0.009 | 0.426  | 2.492 | 0.182 | 0.446  | 5.818  | 0.199 |
| Ba             | 0.900  | 5.767 | 0.810 | -0.190 | 0.495 | 0.036 | 0.144  | 0.606  | 0.021 |
| Cd             | 0.156  | 0.174 | 0.024 | -0.145 | 0.290 | 0.021 | -0.015 | 0.007  | 0.000 |
| Cr             | 0.715  | 3.638 | 0.511 | 0.673  | 6.213 | 0.453 | -0.023 | 0.016  | 0.001 |
| Cu             | -0.103 | 0.076 | 0.011 | -0.090 | 0.111 | 0.008 | 0.810  | 19.180 | 0.656 |
| Pb             | 0.646  | 2.970 | 0.417 | 0.726  | 7.241 | 0.528 | 0.074  | 0.162  | 0.006 |
| Mo             | 0.000  | 0.000 | NaN   | 0.000  | 0.000 | NaN   | 0.000  | 0.000  | NaN   |
| U              | 0.000  | 0.000 | NaN   | 0.000  | 0.000 | NaN   | 0.000  | 0.000  | NaN   |
| Sr             | 0.873  | 5.423 | 0.762 | -0.387 | 2.059 | 0.150 | 0.058  | 0.097  | 0.003 |
| Co             | 0.715  | 3.638 | 0.511 | 0.673  | 6.213 | 0.453 | -0.023 | 0.016  | 0.001 |
| As             | 0.715  | 3.638 | 0.511 | 0.673  | 6.213 | 0.453 | -0.023 | 0.016  | 0.001 |
| Li             | 0.260  | 0.481 | 0.068 | -0.268 | 0.986 | 0.072 | 0.115  | 0.388  | 0.013 |
| Ti             | 0.718  | 3.665 | 0.515 | 0.654  | 5.871 | 0.428 | 0.057  | 0.096  | 0.003 |

**Supplementary Data Table S3.** Summary of individuals for the Principal Component Analysis (PCA) conducted in R for the eight Temperate Highland Peat Swamps on Sandstone (THPSS) assessed in the Blue Mountains (with four urban and four naturally vegetated sites) over three sampling events (from April – June 2018). Dist refers to the distance matrix, Dim refers to the dimension number (first three are shown), ctr refers to the contribution of each individual to a given principal component (as a percentage (%)), and cos2 refers to the squared cosine for each principal component that indicates the quality of representation for individuals. The individuals are indicated as urban Bullaburra (1-3), Wentworth Falls (4-6), North Lawson (7-9), and Popes Glen (10-12), and naturally vegetated Mount Hay (13), Hat Hill (14-16), Lawson (17-19), and Kings Tableland (20-22).

| Individuals | Dist   | Dim.1  | ctr    | cos2  | Dim.2  | ctr    | cos2  | Dim.3  | ctr    | cos2  |
|-------------|--------|--------|--------|-------|--------|--------|-------|--------|--------|-------|
| 1           | 7.844  | 4.463  | 6.445  | 0.324 | -3.316 | 6.860  | 0.179 | 0.977  | 1.269  | 0.016 |
| 2           | 5.800  | 3.527  | 4.026  | 0.370 | -2.504 | 3.910  | 0.186 | -1.245 | 2.060  | 0.046 |
| 3           | 14.867 | 12.280 | 48.789 | 0.682 | 8.324  | 43.218 | 0.313 | -0.196 | 0.051  | 0.000 |
| 4           | 3.897  | -0.359 | 0.042  | 0.008 | -0.294 | 0.054  | 0.006 | 1.971  | 5.161  | 0.256 |
| 5           | 3.258  | -0.821 | 0.218  | 0.064 | -0.348 | 0.076  | 0.011 | -1.019 | 1.380  | 0.098 |
| 6           | 3.740  | -0.506 | 0.083  | 0.018 | 0.145  | 0.013  | 0.001 | -2.493 | 8.257  | 0.445 |
| 7           | 5.004  | 1.942  | 1.220  | 0.151 | -3.638 | 8.257  | 0.529 | 1.571  | 3.279  | 0.099 |
| 8           | 4.851  | 1.412  | 0.645  | 0.085 | -3.154 | 6.207  | 0.423 | -0.844 | 0.947  | 0.030 |
| 9           | 3.993  | 0.521  | 0.088  | 0.017 | -2.274 | 3.225  | 0.324 | -2.245 | 6.692  | 0.316 |
| 10          | 6.282  | 3.469  | 3.894  | 0.305 | -3.193 | 6.360  | 0.258 | 2.869  | 10.934 | 0.209 |
| 11          | 6.905  | 3.188  | 3.288  | 0.213 | -2.866 | 5.123  | 0.172 | -0.139 | 0.026  | 0.000 |
| 12          | 4.352  | 1.376  | 0.612  | 0.100 | -1.571 | 1.540  | 0.130 | -2.560 | 8.705  | 0.346 |
| 13          | 5.888  | -2.678 | 2.320  | 0.207 | 1.612  | 1.620  | 0.075 | 3.744  | 18.621 | 0.404 |
| 14          | 4.217  | -3.318 | 3.561  | 0.619 | 1.197  | 0.894  | 0.081 | 1.518  | 3.062  | 0.130 |
| 15          | 4.083  | -3.499 | 3.962  | 0.735 | 1.287  | 1.033  | 0.099 | -0.519 | 0.357  | 0.016 |
| 16          | 5.761  | -3.835 | 4.759  | 0.443 | 1.826  | 2.079  | 0.100 | -2.495 | 8.271  | 0.188 |
| 17          | 4.339  | -3.187 | 3.287  | 0.539 | 0.467  | 0.136  | 0.012 | 1.726  | 3.956  | 0.158 |
| 18          | 3.812  | -3.122 | 3.154  | 0.671 | 0.944  | 0.556  | 0.061 | -1.158 | 1.781  | 0.092 |
| 19          | 4.368  | -3.145 | 3.200  | 0.519 | 1.193  | 0.887  | 0.075 | -2.299 | 7.018  | 0.277 |
| 20          | 4.718  | -2.576 | 2.146  | 0.298 | 1.944  | 2.358  | 0.170 | 2.378  | 7.513  | 0.254 |
| 21          | 4.671  | -2.553 | 2.109  | 0.299 | 1.933  | 2.331  | 0.171 | 0.672  | 0.601  | 0.021 |
| 22          | 4.753  | -2.580 | 2.153  | 0.295 | 2.288  | 3.264  | 0.232 | -0.214 | 0.061  | 0.002 |

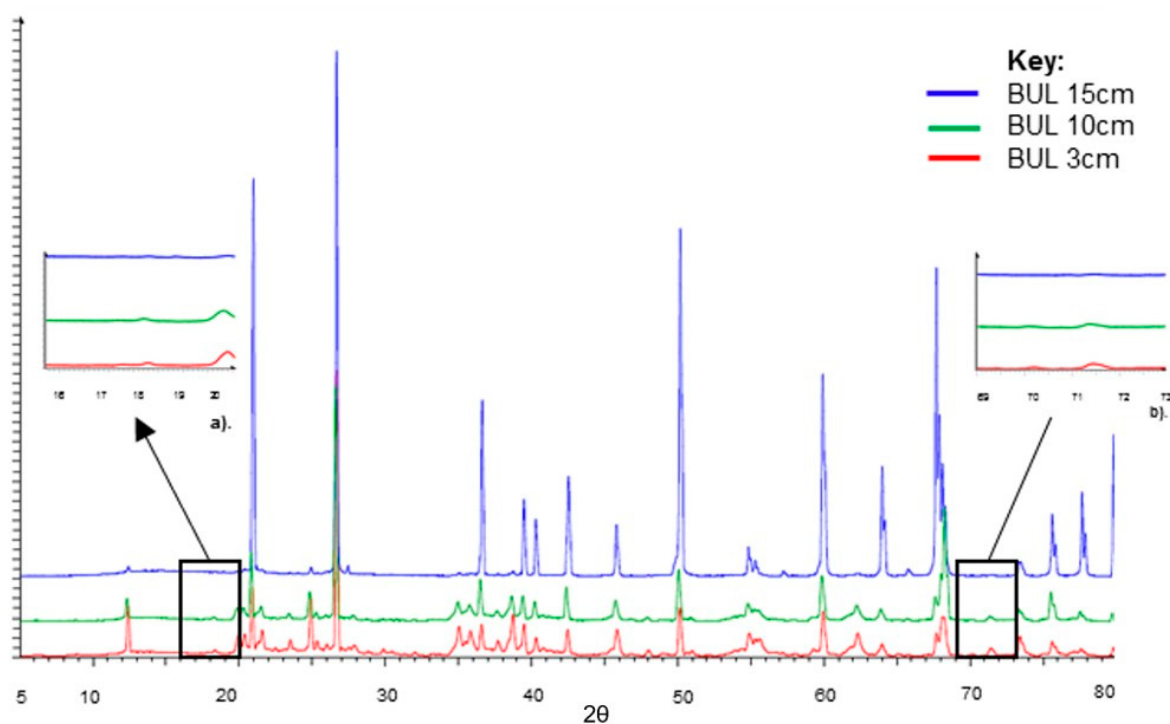

**Supplementary Data Figure S3.** X-ray diffraction (XRD) spectra for sediment samples from the core collected from urban Bullaburra (BUL) Temperate Highland Peat Swamps on Sandstone (THPSS), where samples were collected at a depth of 3 cm (red), 10 cm (green) and 15 cm (blue). Key peaks associated with the presence of calcium hydroxide ( $\text{Ca(OH)}_2$ ) are indicated, including at a). 18 degrees  $2\theta$  and b). 71.5 degrees  $2\theta$ . The y axis refers to intensity.

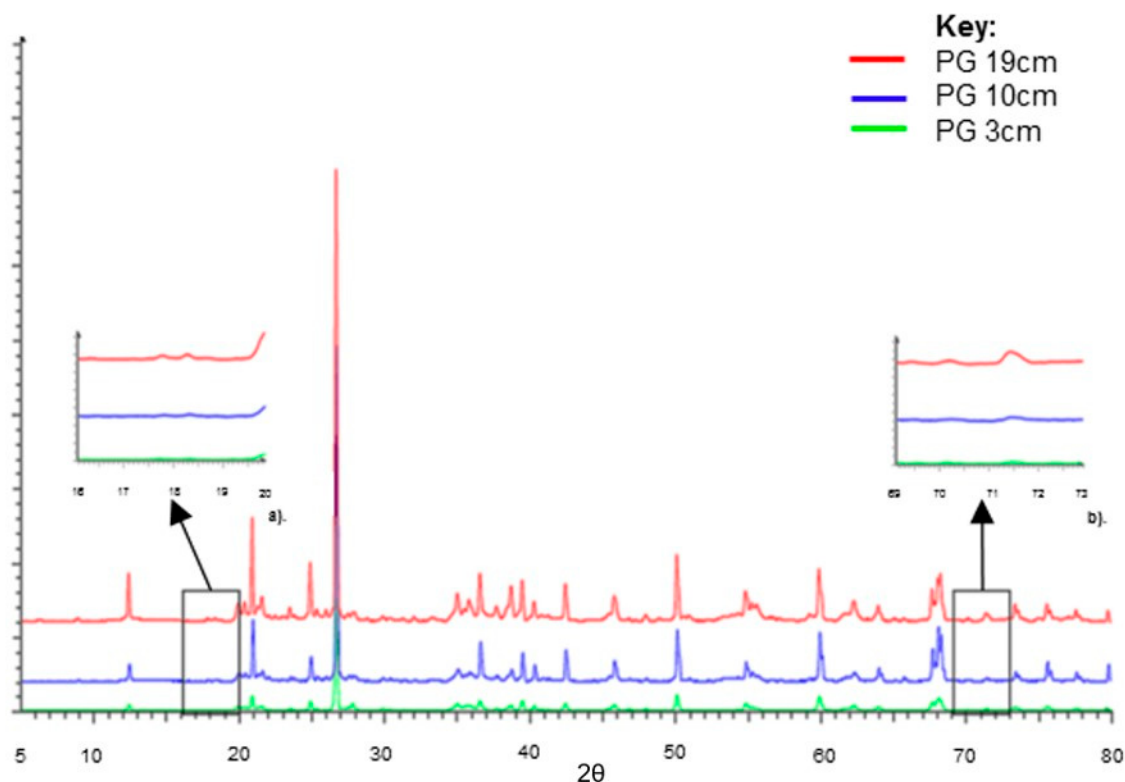

**Supplementary Data Figure. S4.** X-ray diffraction (XRD) spectra for sediment samples from the core collected from urban Popes Glen (PG) Temperate Highland Peat Swamps on Sandstone (THPSS), where samples were collected at a depth of 3 cm (light green), 10 cm (blue) and 19 cm (red). Key peaks associated with the presence of calcium hydroxide ( $\text{Ca}(\text{OH})_2$ ) are indicated, including at a). 18 degrees  $2\theta$  and b). 71.5 degrees  $2\theta$ . The y axis refers to intensity.
